# Supplementary material for: Clinical Pattern of Preoperative Positron Emission Tomography/Computed Tomography (PET/CT) Can Predict the Aggressive Behavior of Resected Solid Pseudopapillary Neoplasm of the Pancreas
Source: MDPI journal article supplement (doi:10.3390/cancers13092119), 2021-04-27
Supplement: s1 [file s1]

# Supplementary Materials: Clinical Pattern of Preoperative Positron Emission Tomography/Computed Tomography (PET/CT) Can Predict the Aggressive Behavior of Resected Solid Pseudopapillary Neoplasm of the Pancreas

Ji-Su Kim, Emmanuel II-Uy Hao, Seoung-Yoon Rho, Ho-Kyoung Hwang, Woo-Jung Lee, Dong-Sub Yoon and Chang-Moo Kang

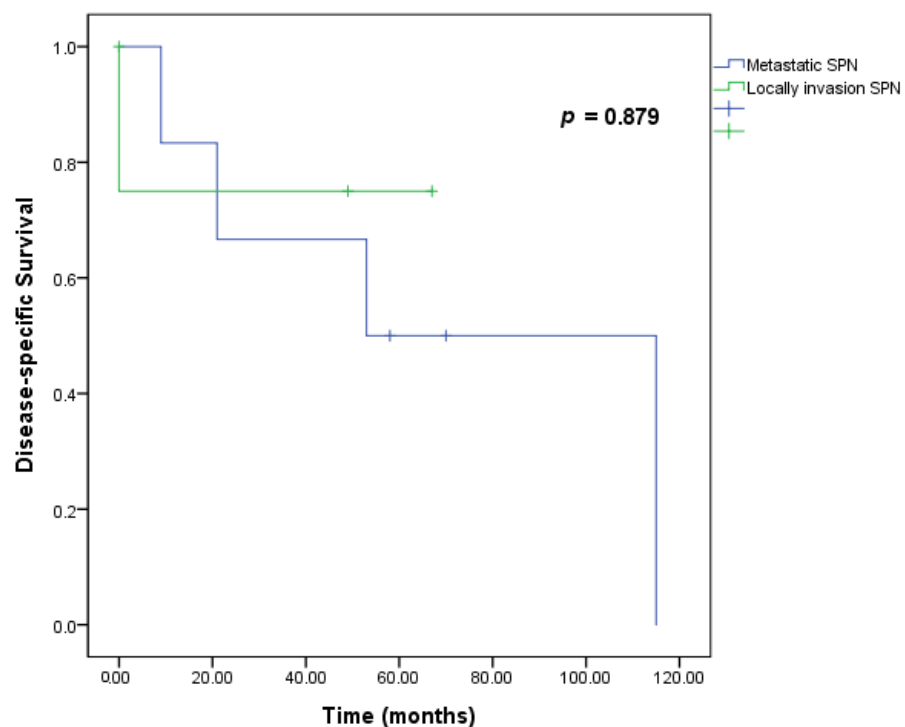

**Figure S1.** Disease-specific Survival plot for Aggressive versus Non-aggressive SPN; SPN, Solid pseudopapillary neoplasm.

**Table S1.** Characteristics of patients with metastatic and Locally invasion solid pseudopapillary tumor.

| Variables                  | Metastatic SPN ( <i>n</i> = 6) | Locally Invasion SPN ( <i>n</i> = 4) | <i>p</i> -value |
|----------------------------|--------------------------------|--------------------------------------|-----------------|
| Age                        | -                              | -                                    | -               |
| ≥40*                       | 5 (83.3%)                      | 2 (50%)                              | 0.500           |
| 19–39                      | 0                              | 1 (25%)                              | >0.999          |
| ≤18                        | 1 (16.7%)                      | 1 (25%)                              | >0.999          |
| Sex (F/M)                  | 5/1                            | 2/2                                  | 0.500           |
| BMI                        | 21.2 ± 4.45                    | 22.5 ± 5.74                          | 0.710           |
| Symptomatic (yes/no)       | 5/1                            | 4/0                                  | >0.999          |
| Location (proximal/distal) | 1/5                            | 3/1                                  | 0.190           |
| Tumor size                 | -                              | -                                    | -               |
| ≥10 cm                     | 3 (50%)                        | 1 (25%)                              | 0.571           |
| ≥5 cm                      | 3 (50%)                        | 3 (75%)                              | 0.571           |
| ≥2 cm                      | 5 (83.3%)                      | 4 (100%)                             | >0.999          |
| PET configuration*         | -                              | -                                    | -               |
| Type III                   | 3 (60%)                        | 4 (100%)                             | >0.999          |
| Non-type III               | 2 (40%)                        | 0                                    | >0.999          |
| Complication (yes/no)      | 1/5                            | 3/1                                  | 0.190           |
| Microscopic pathology      | -                              | -                                    | -               |
| Margin                     | All negative                   | All negative                         | -               |
| Capsular invasion          | 1 (16.7%)                      | 1 (25%)                              | >0.999          |
| Lymphovascular invasion    | 2 (33.3%)                      | 1 (25%)                              | >0.999          |
| Perineural invasion        | 2 (33.3%)                      | 1 (25%)                              | >0.999          |
| Ki-67                      | 4.63 ± 5.31                    | 1.00 ± 0.0                           | 0.266           |

Values are *n* (%), mean ± standard deviation. PET, positron emission tomography; BMI, body mass index; WBC, white blood cell; CI, confidence interval.
